# Supplementary material for: Cesium lead iodide solar cells controlled by annealing temperature
Source: Royal Society of Chemistry journal article supplement (doi:10.1039/c6cp08177k), 2017-01-01
Supplement: c6cp08177k1.pdf [file c6cp08177k1.pdf]

## Cesium lead iodide solar cell controlled by annealing temperature

Yu Geun Kim<sup>a,†</sup>, Tae-Yoon Kim<sup>b,c,†</sup>, Jeong Hyeon Oh<sup>a</sup>, Kyoung Soon Choi<sup>d</sup>,  
Young-Jea Kim<sup>\*b</sup>, and Soo Young Kim<sup>\*a</sup>

<sup>a</sup>School of Chemical Engineering and Materials Science, Chung-Ang University 221 Heukseok-dong, Dongjak-gu, Seoul 156-756, Republic of Korea

<sup>b</sup> School of Mechanical Engineering, Sungkyunkwan University, 2066 Seobu-ro, Jangan-gu, Suwon, Kyunggi-do 16419, Republic of Korea.

<sup>c</sup> Korea Marine Equipment Research Institute #301, Korea Industrial Complex Corp. Gunsan Branch Office R&D Center, 169, Sandannambuk-ro, Gunsan, Jeollabuk-do 573-540, Korea

<sup>d</sup>Advanced Nano-surface Research Group, Korea Basic Science Institute, Daejeon 305-333, Republic of Korea

<sup>†</sup> These authors contributed equally to this work.

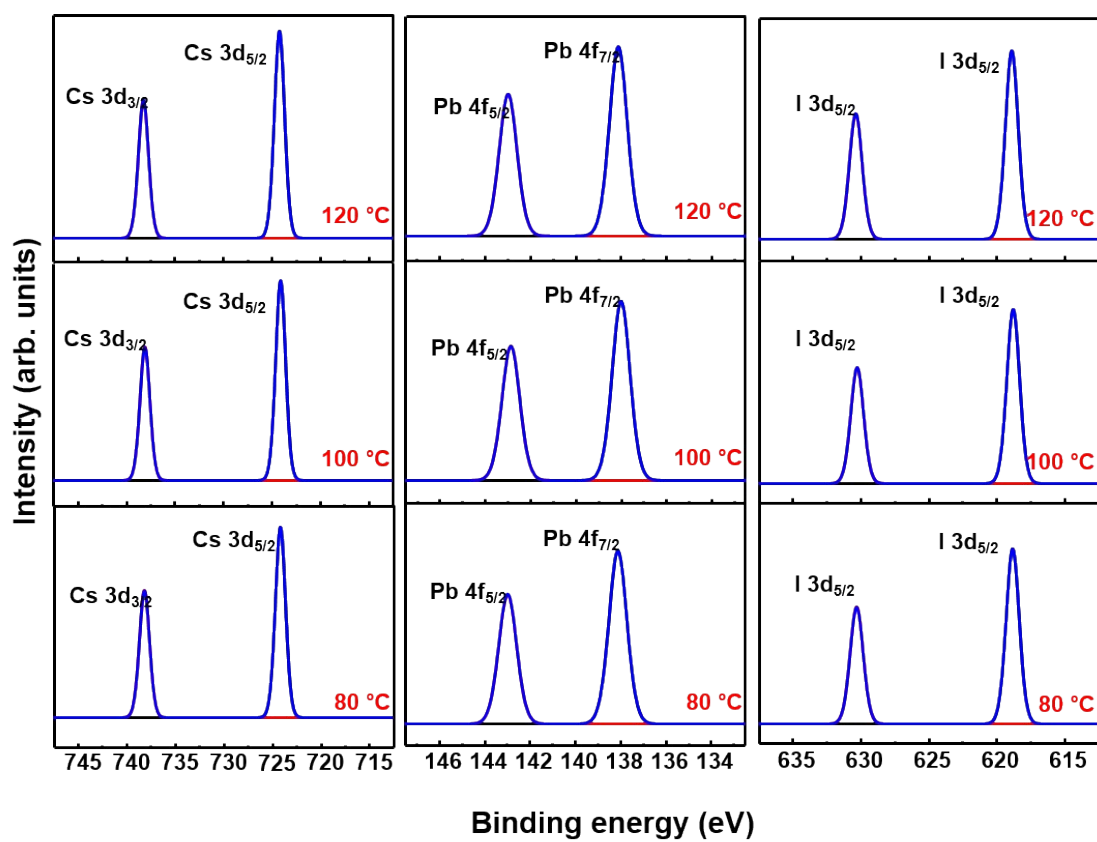

**Figure S1** X-ray photoelectron spectroscopy (XPS) spectra of CsPbI<sub>3</sub> film.

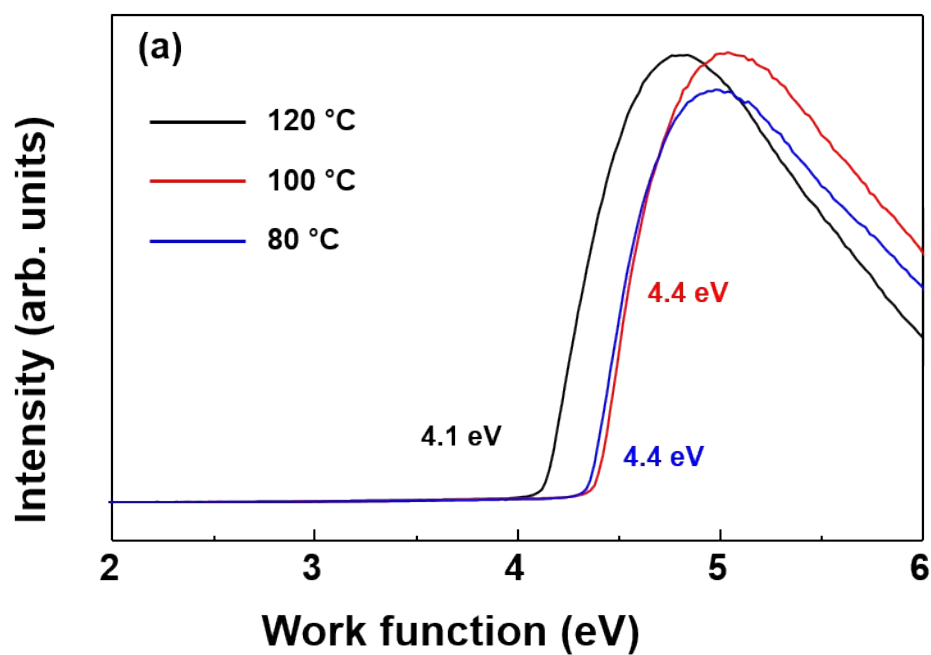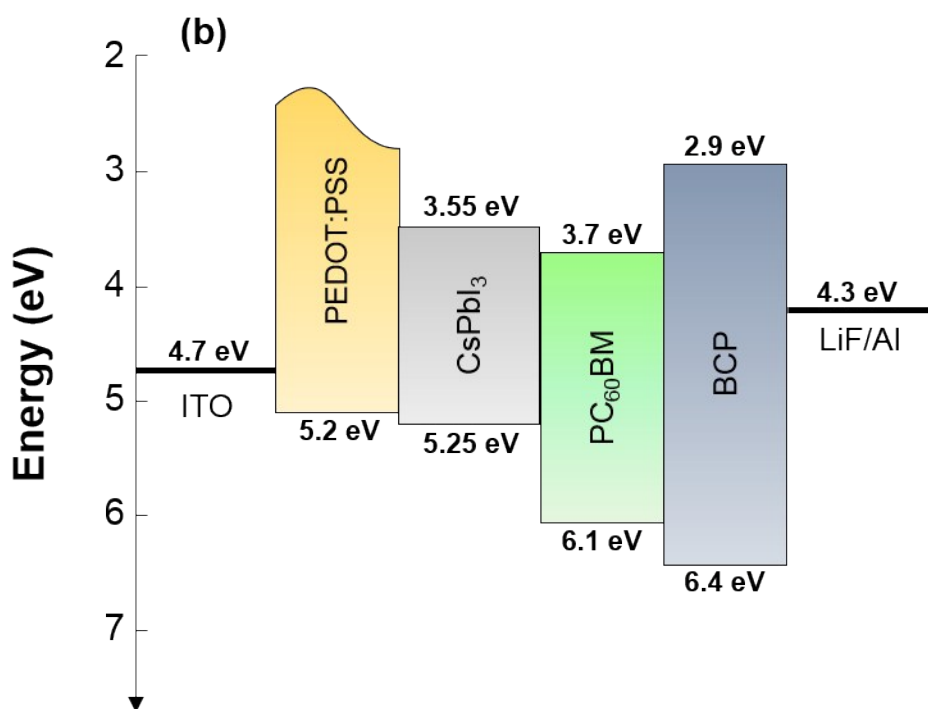

**Figure S2** Work function of temperature control from 80 °C to 120 °C and energy band diagram of PSC.
